# Supplementary material for: Mutations at the hydrophobic core affect Hal3 trimer stability, reducing its Ppz1 inhibitory capacity but not its PPCDC moonlighting function
Source: PubMed Central journal article supplement (PMC6168597; doi:10.1038/s41598-018-32979-x), 2018-10-02
Supplement: 41598_2018_32979_MOESM1_ESM.pdf [file 41598_2018_32979_MOESM1_ESM.pdf]

Mutations at the hydrophobic core affect Hal3 trimer stability, reducing its Ppz1 inhibitory capacity but not its PPCDC moonlighting function.  
Carlos Santolaria, Diego Velázquez, Erick Strauss and Joaquín Ariño

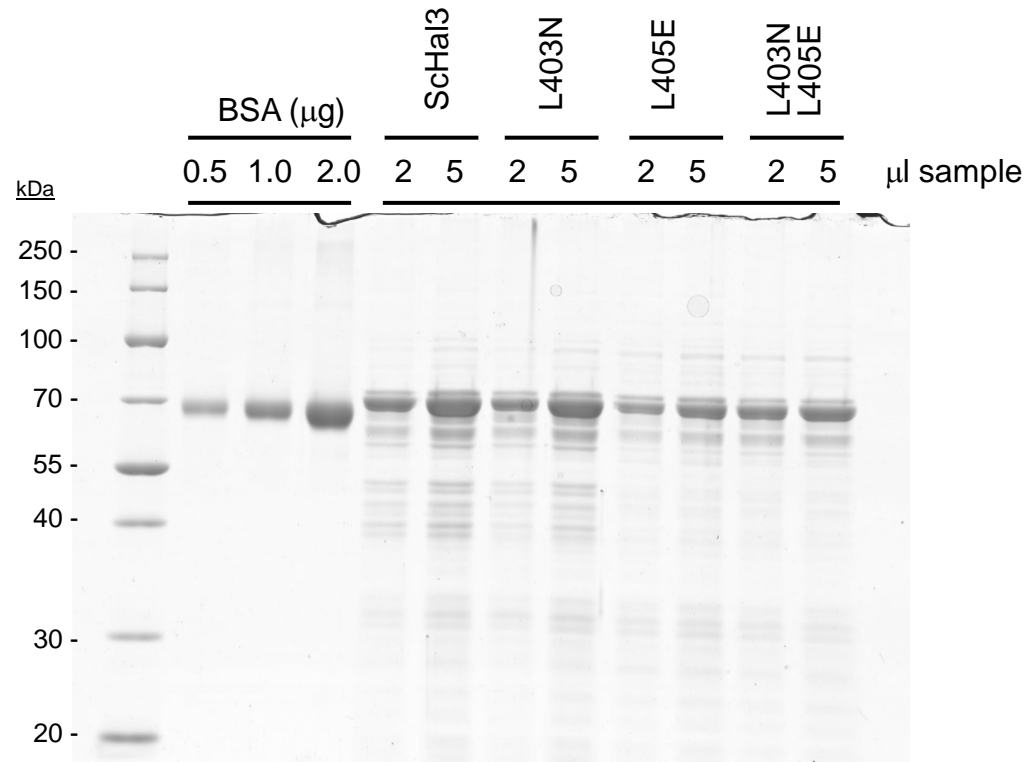

**Supplementary Figure S1.** Expression of ScHal3 and its variants in *E. coli* and, upon removal of the GST-moiety, analysis of the recombinant proteins (2 and 5  $\mu\text{l}$ ) by SDS-PAGE (10% polyacrylamide) followed by Coomassie staining. Bovine serum albumin (0.5 to 2.0  $\mu\text{g}$ ) was run in parallel for comparison of protein amounts.

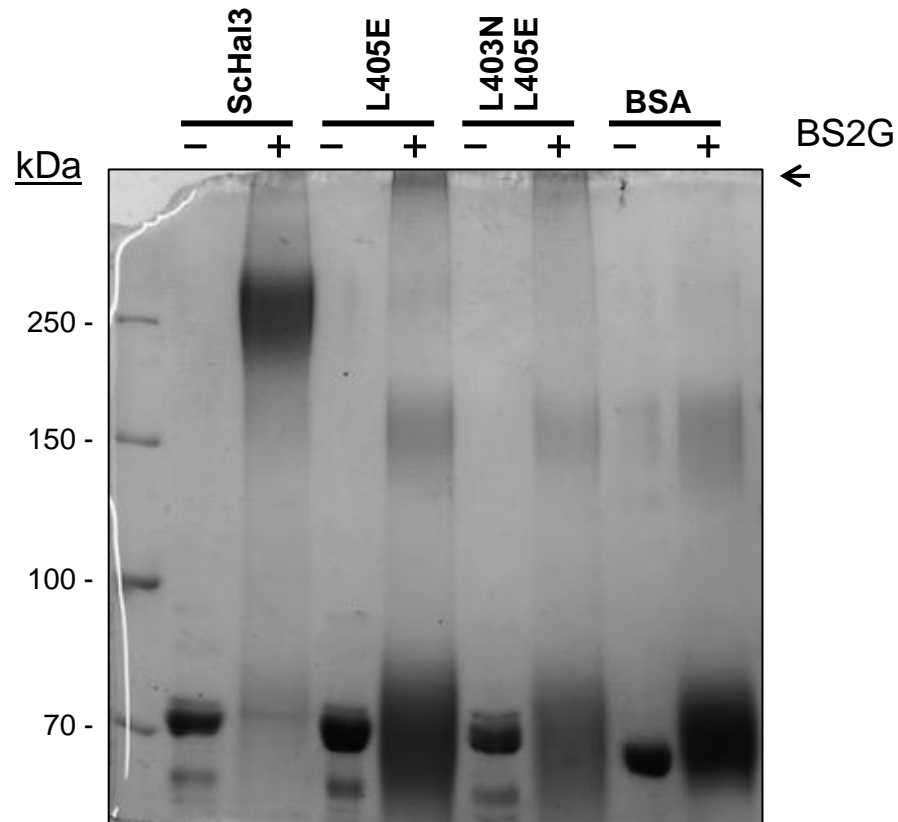

**Supplementary Figure S2.** *In vitro* cross-linking of ScHal3 variants using Bis-(sulfosuccinimidyl) glutarate (BS2G). Samples (20  $\mu$ g) were processed as described in Material and Methods, resolved by SDS-PAGE (6% polyacrylamide gel) and proteins were visualized by staining with Coomassie Brilliant Blue R-250. Note that native ScHal3 forms species migrating with an apparent molecular mass of around 3-fold that of the monomers. The arrow indicates the appearance of very high molecular mass structures. The diffuse band appearing around 150 kDa is unspecific, as it also appears with BSA is treated with the cross-linking reagent.

**Supplementary Table S1. Oligonucleotides used in this work**

| <b>Name</b>          | <b>Sequence</b>                         | <b>Description / Use</b>           |
|----------------------|-----------------------------------------|------------------------------------|
| AtHal3_EcoRI_5       | CGTGAATTCGAGAATGGGAAAAGAGACAG           | AtHal3 cloning                     |
| AtHal3_Sall_3        | TACGTCGACTTAACTAGTTCCACCGGTTT           | AtHal3 cloning                     |
| AtHal3_L117E_5       | AAGATTGCTGGTGGGGAATGTGATAATCTTCTGACTTGC | AtHal3 L117E mutation              |
| AtHal3_L117E_3       | TCAGAAGATTATCACATTCCCCACCAGCAATCTT      | AtHal3 L117E mutation              |
| AtHal3_G115N_L117E_5 | CCTTAGGCAAGATTGCTAATGGGGAATGTGATAATC    | AtHal3 G115N and L117E mutation    |
| AtHal3_G115N_L117E_3 | GATTATCACATTCCCCATTAGCAATCTTGCCTAAGG    | AtHal3 G115N and L117E mutation    |
| ScHal3_L405E_5       | AAAATTGCTTTGGGCGAATGCGACAATCTTCTGACAA   | ScHal3 L405E                       |
| ScHal3_L405E_3       | CAGAAGATTGTGCGCATTCGCCAAAGCAATTTTTGATAA | ScHal3 L405E                       |
| ScHal3 L403N 5'      | TTATCAAAAATTGCTAATGGCCTGTGCGACAATCT     | ScHal3 L403N mutation              |
| ScHal3 L403N 3'      | GATTGTGCGCACAGGCCATTAGCAATTTTTGATAATG   | ScHal3 L403N mutation              |
| ScHal3_L403N_L405E_5 | TTATCAAAAATTGCTAATGGCGAATGCGACAATCT     | ScHal3 L403N and L405E mutation    |
| ScHal3_L403N_L405E_3 | GATTGTGCGCATTCGCCATTAGCAATTTTTGATAATG   | ScHal3 L403N and L405E mutation    |
| 5HAL3_EcoRI          | GGGAATTCATGACTGCCGTGCGCTCTACT           | PCR for ScHal3 cloning in pGEX-6P1 |
| 3HAL3_XhoI           | CACGCTCGAGCATAGACTATTTATTGATGC          | PCR for ScHal3 cloning in pGEX-6P1 |

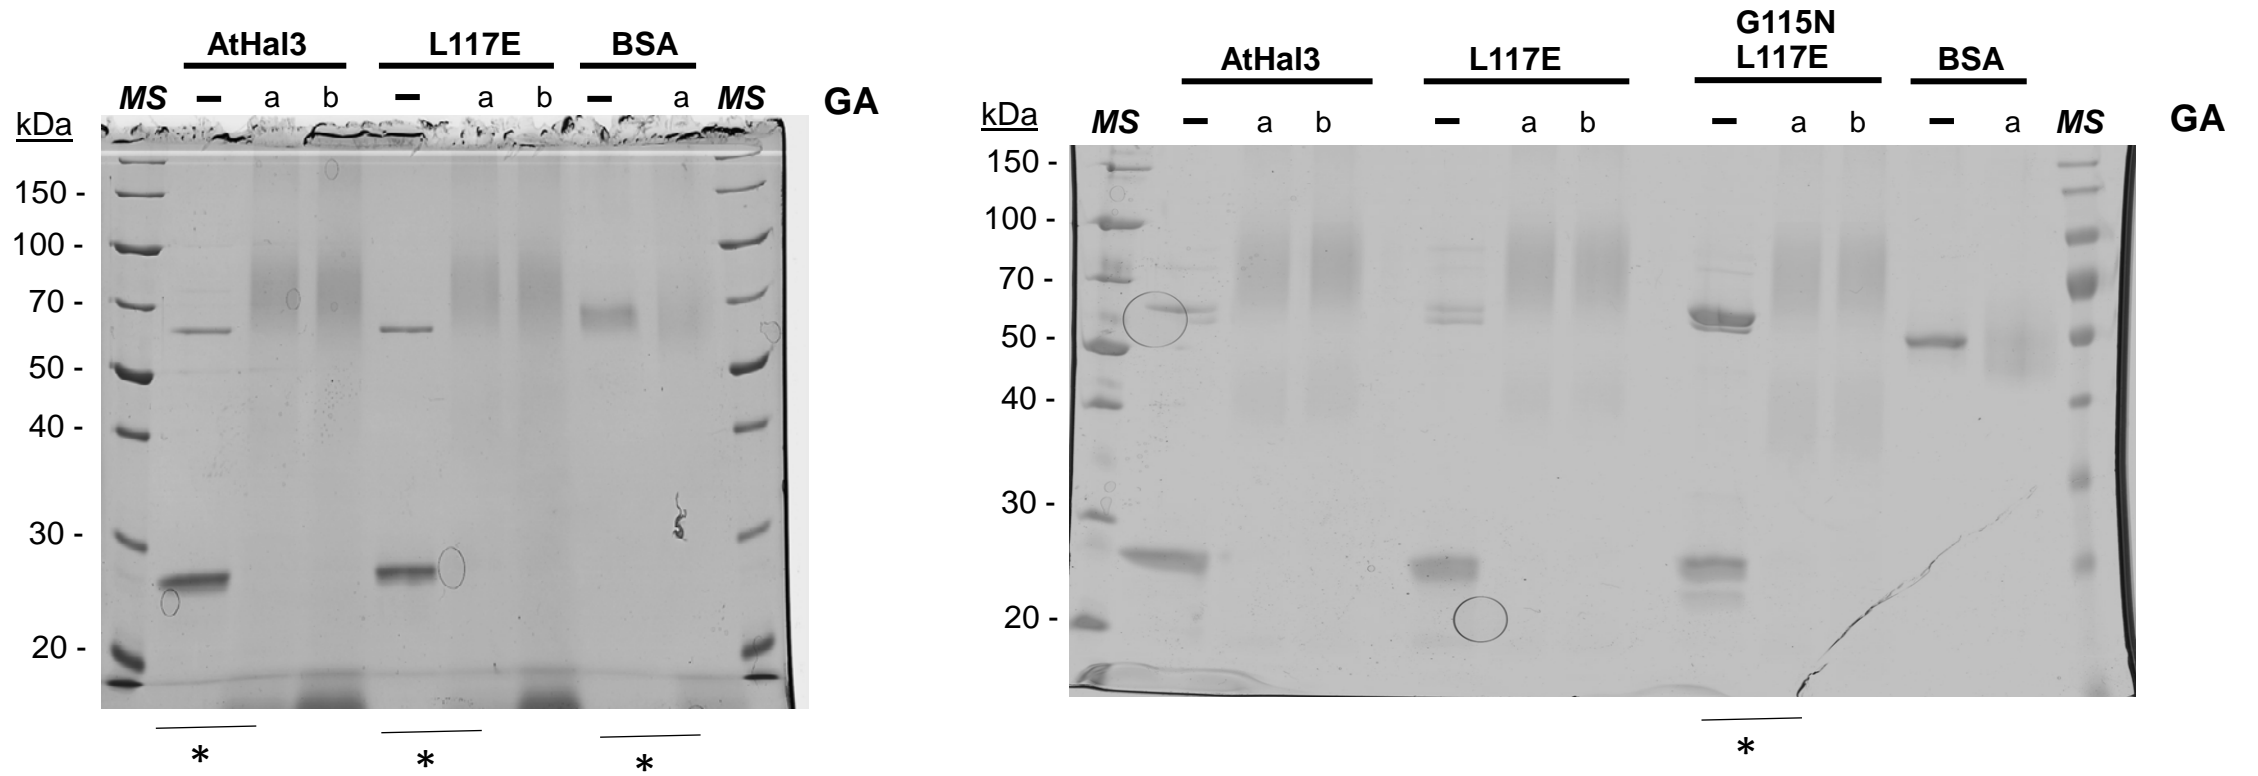

**Supplementary Figure S3.** Original uncropped images corresponding to those shown in figure 3A (denoted by asterisks at the bottom of the images). Concentration of glutaraldehyde (GA) used were: none (-), 0.01% (a) and 0.005% (b).
